# Supplementary material for: Injectable hydrogel loaded with 4-octyl itaconate enhances cartilage regeneration by regulating macrophage polarization
Source: Royal Society of Chemistry journal article supplement (doi:10.1039/d2bm01894b), 2023-01-01
Supplement: d2bm01894b1.pdf [file d2bm01894b1.pdf]

## Supporting information

### **Injectable hydrogel loaded with 4-octyl Itaconate enhances cartilage regeneration by regulating macrophage polarization**

Hui Xiao<sup>1</sup>, Yunsheng Dong<sup>1\*</sup>, Dongdong Wan<sup>2</sup>, Jiaying Huang<sup>1</sup>, Lizong Tang<sup>1</sup>, Jie Zhou<sup>1</sup>, Tingting Yang<sup>1</sup>, Yufei Liu<sup>1</sup>, Shufang Wang<sup>1\*</sup>.

1. Key Laboratory of Bioactive Materials for Ministry of Education, College of Life Sciences, Nankai University, Tianjin 300071, China

2. Department of Orthopedic, Tianjin First Central Hospital, Nankai University, Tianjin, 300192, China

\* Corresponding author.

Yunsheng Dong\*: [yunshengd@163.com](mailto:yunshengd@163.com)

Shufang Wang\*: [wangshufang@nankai.edu.cn](mailto:wangshufang@nankai.edu.cn)

| Gene          |         | Primers (5'-3')           |
|---------------|---------|---------------------------|
| IL-6          | Forward | CTGCAAGAGACTTCCATCCAG     |
|               | Reverse | AGTGGTATAGACAGGTCTGTTGG   |
| iNOS          | Forward | CCACAATAGTACAATACTACTTGG  |
|               | Reverse | ACGAGGTGTTTCAGCGTGCTCCACG |
| TNF- $\alpha$ | Forward | CGTCGTAGCAAACCACCAAG      |
|               | Reverse | TTGAAGAGAACCTGGGAGTAGACA  |
| Arg-1         | Forward | AGCTCTGGGAATCTGCATGG      |
|               | Reverse | ATGTACACGATGTCTTTGGCAGATA |
| IL-13         | Forward | CAACAGCAGCATGGTATGGAGC    |

|              |         |                      |
|--------------|---------|----------------------|
| TGF- $\beta$ | Reverse | CGATTTTGGTATCTGGGGGG |
|              | Forward | CTAAGGCTCGCCAGTCCCC  |
| GAPDH        | Reverse | TGCGTTGTTGCGGTCCAC   |
|              | Forward | CCCTTAAGAGGGATGCTGCC |
|              | Reverse | TACGGCCAAATCCGTTCACA |

Table S1 The primer of macrophage polarization related gene

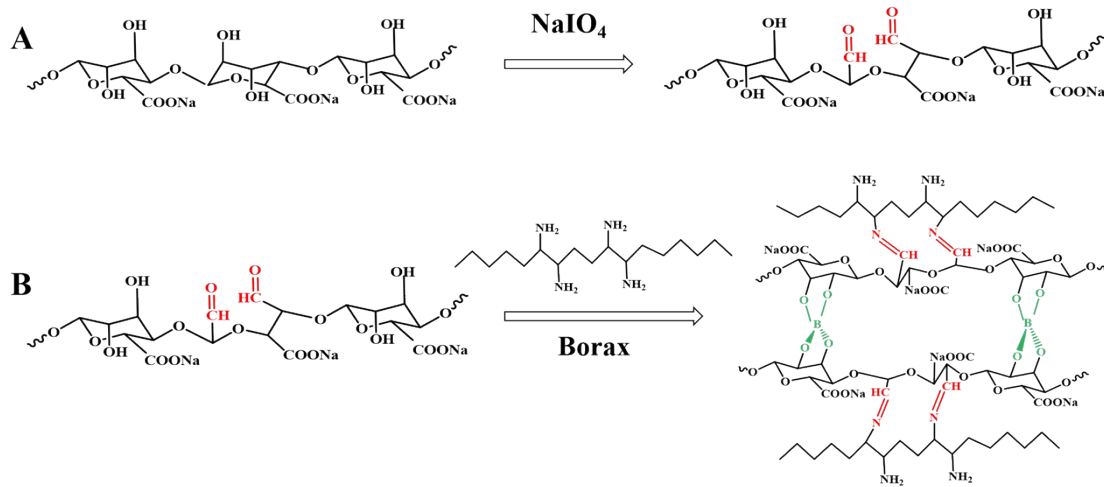

Fig. S1. OSA/GEL hydrogel formation reaction process.

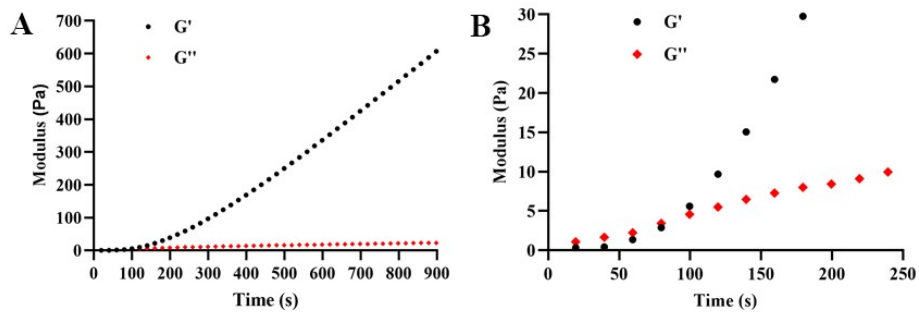

Fig. S2. Rheological results of 10OSA15GEL group, B is the enlarged view.

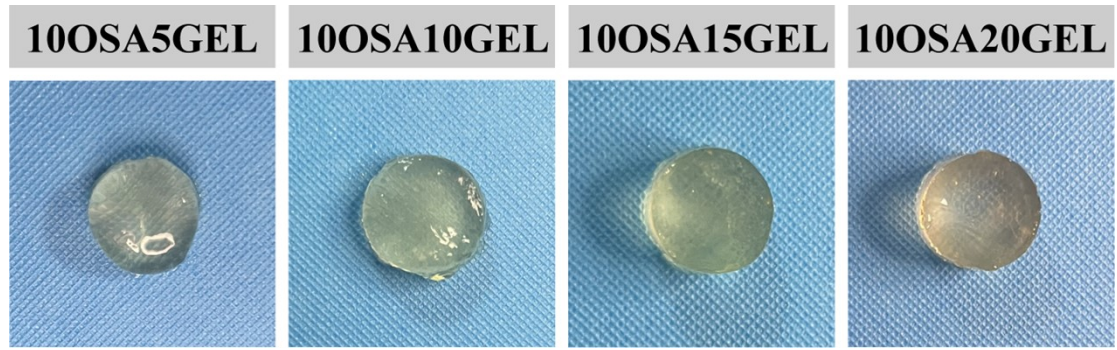

Fig. S3. Macro gelation diagram of four groups of hydrogels.

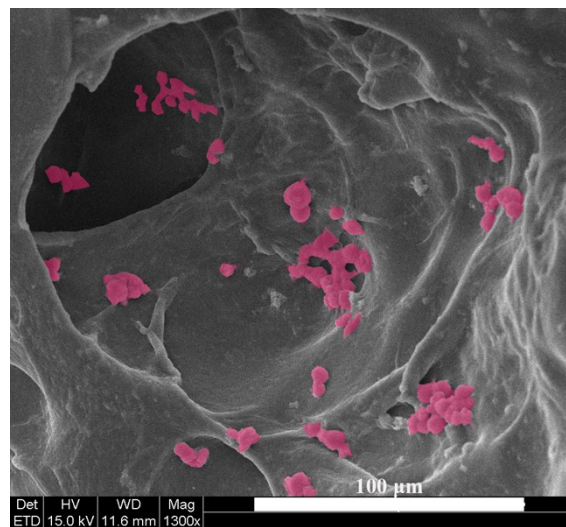

Fig. S4. Cell adhesion on 4-OI@OG hydrogel.

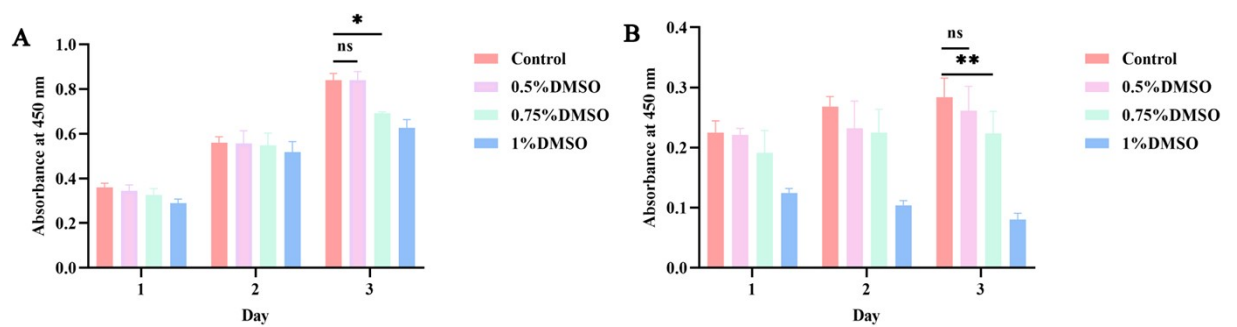

Fig. S5. Cytotoxic CCK-8 detection of DMSO. (A) L929 cells; (B) RAW264.7 cells. (Data are expressed as means  $\pm$  SE,  $n=3$ , \* $P<0.05$ , \*\* $P<0.01$ , \*\*\* $P<0.001$ )

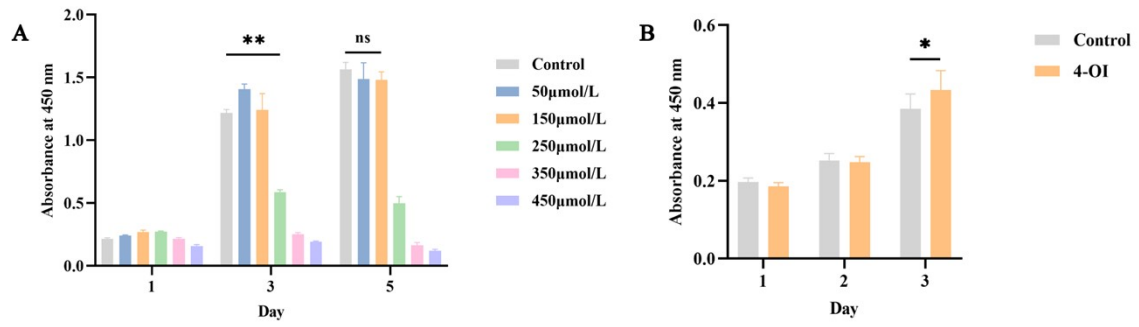

Fig. S6. Cytotoxic CCK-8 detection of 4-OI. (A) L929 cells; (B) RAW264.7 cells (4-OI concentration of 150 μM). (Data are expressed as means ± SE, n=3, \*P<0.05, \*\*P<0.01, \*\*\*P<0.001)

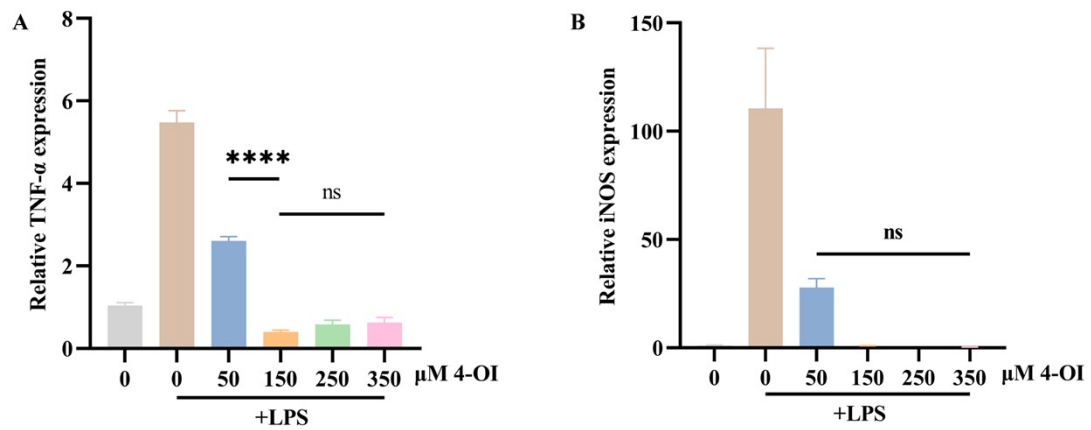

Fig. S7. qRT-PCR results of different 4-OI concentrations. (A) TNF-α; (B) iNOS (Data are expressed as means ± SE, n=3, \*P<0.05, \*\*P<0.01, \*\*\*P<0.001, \*\*\*\*P<0.0001)

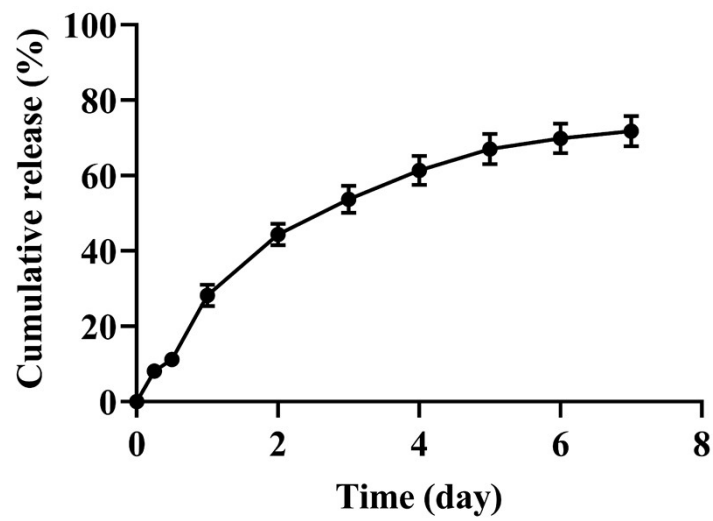

Fig. S8. the release kinetics of 4-OI from the 4-OI@OG hydrogel.

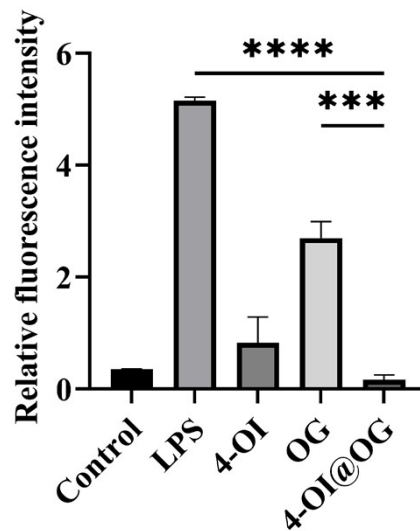

Fig. S9. Average fluorescence intensity to scavenge ROS *in vitro*. (Data are expressed as means  $\pm$  SE, n=3, \*P<0.05, \*\*P<0.01, \*\*\*P<0.001, \*\*\*\*P<0.0001)
